# Supplementary material for: Lignin-Based Epoxy Resins: Unravelling the Relationship between Structure and Material Properties
Source: PubMed Central journal article supplement (PMC7997103; doi:10.1021/acs.biomac.0c00057), 2020-03-11
Supplement: bm0c00057_si_001.pdf [file bm0c00057_si_001.pdf]

# Supporting information

## Lignin fractionation.

### SEC Analysis

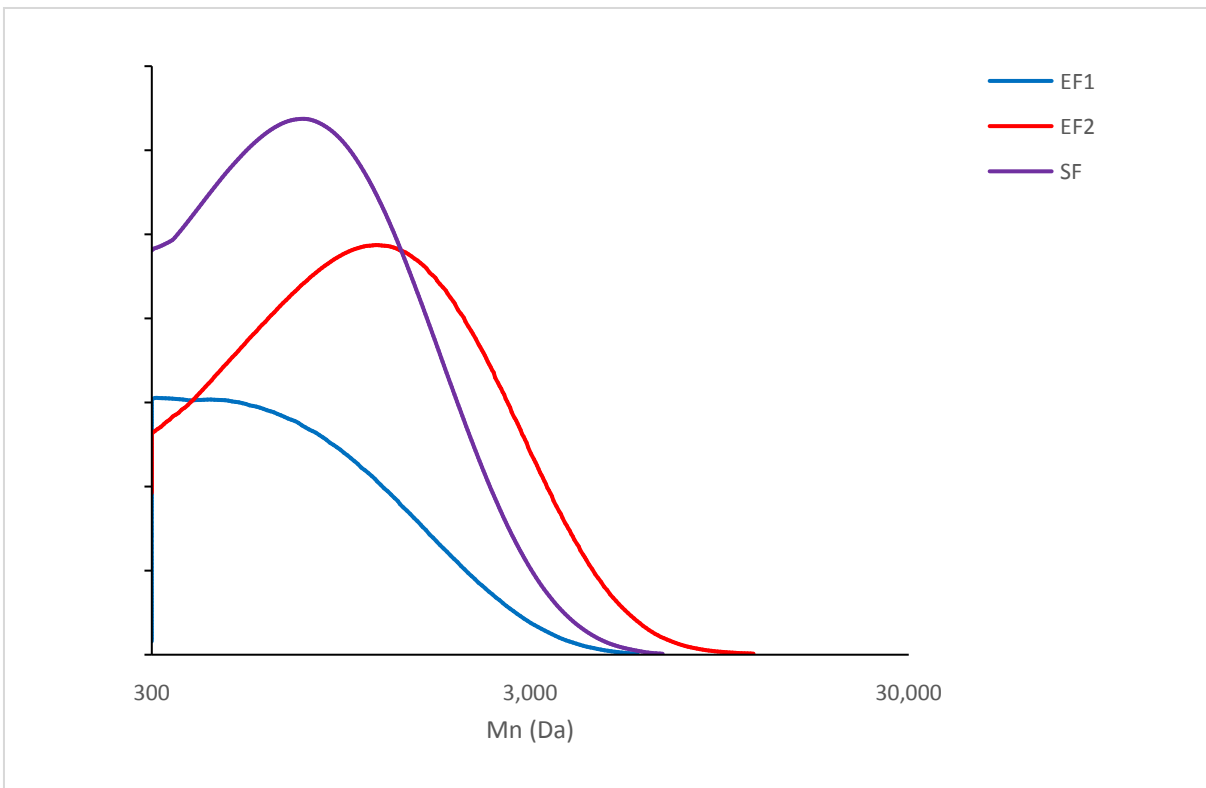

Figure S1: SEC analysis of the obtained lignin fractions.

$^{31}\text{P}$ -NMR ( $\text{CDCl}_3$ )

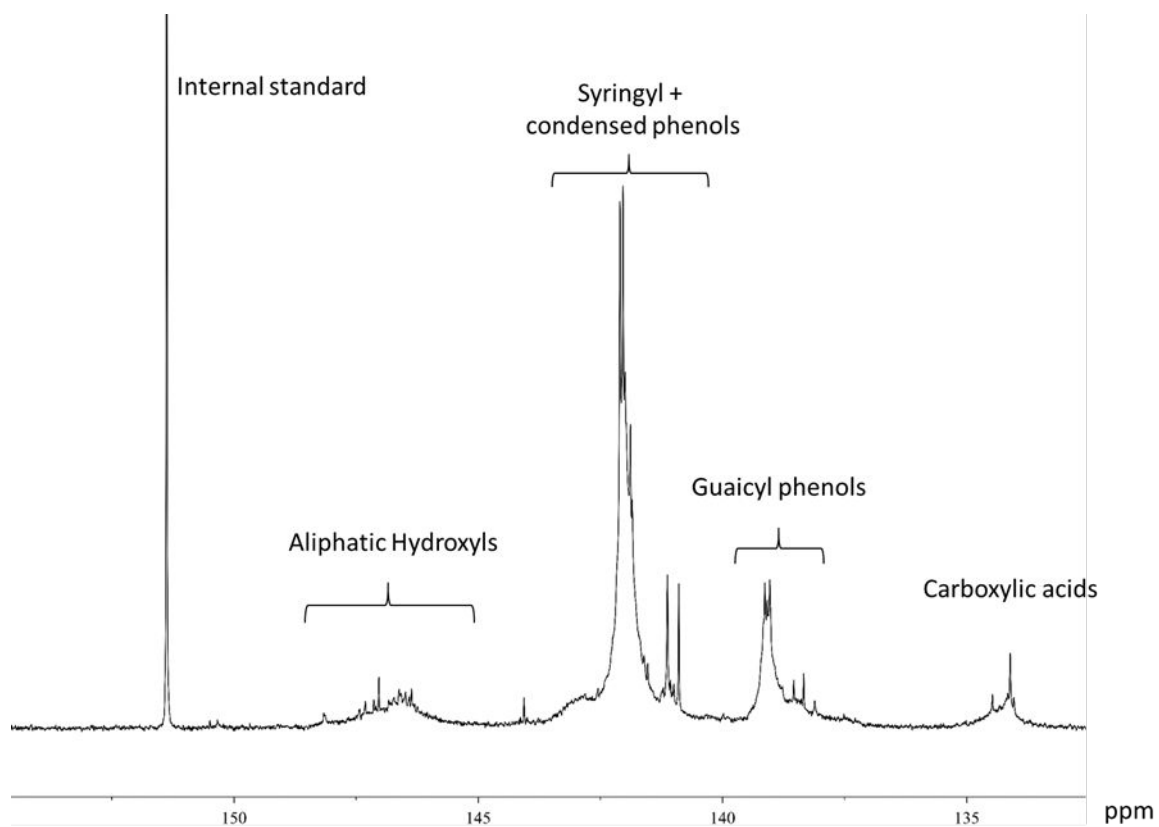

Figure S2:  $^{31}\text{P}$ -NMR of the eucalyptus EtOAc fraction ( $\text{EF}_1$ ).

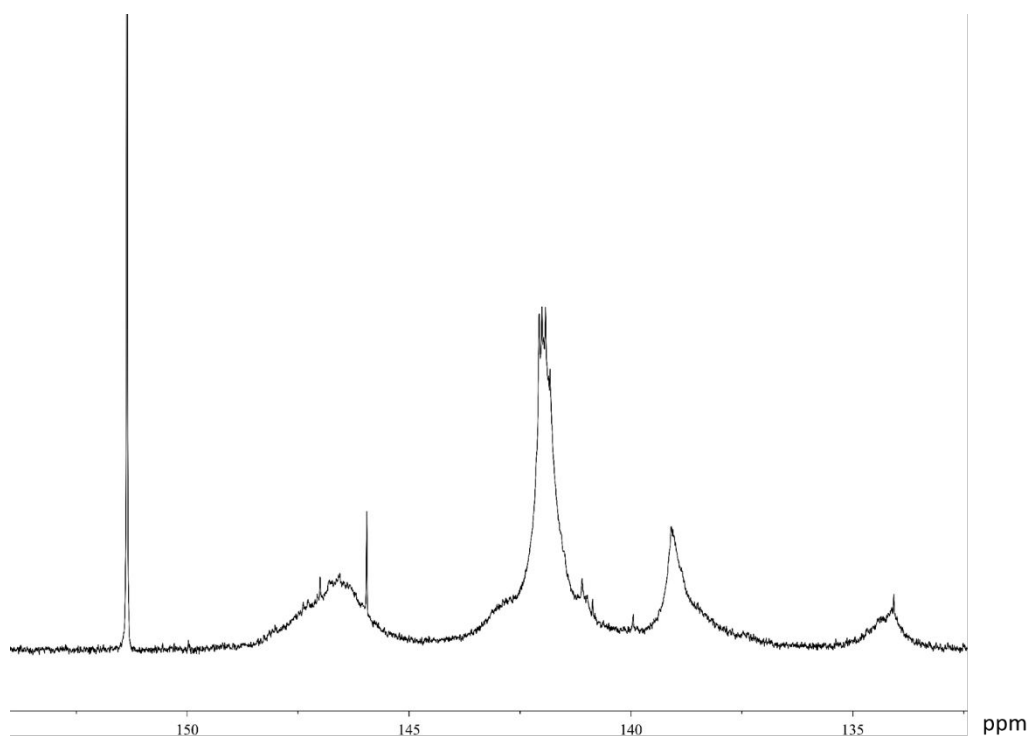

Figure S3:  $^{31}\text{P}$ -NMR of the eucalyptus EtOH fraction ( $\text{EF}_2$ ).

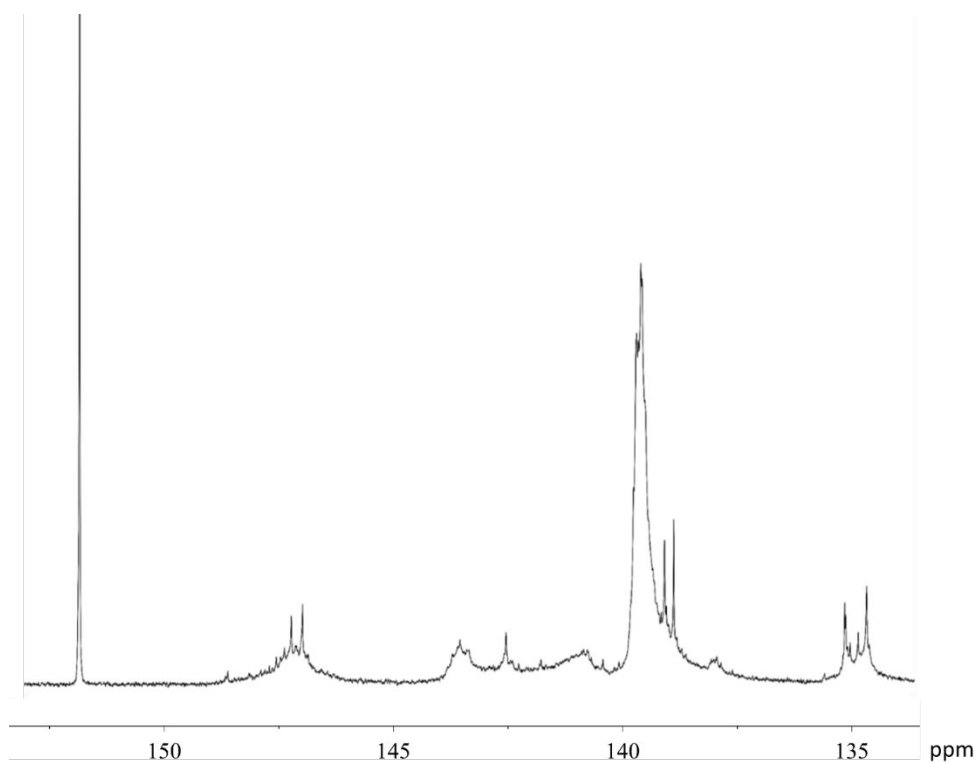

Figure S4:  $^{31}\text{P}$ -NMR of the spruce EtOAc fraction (SF).

*HSQC Analysis (DMSO)*

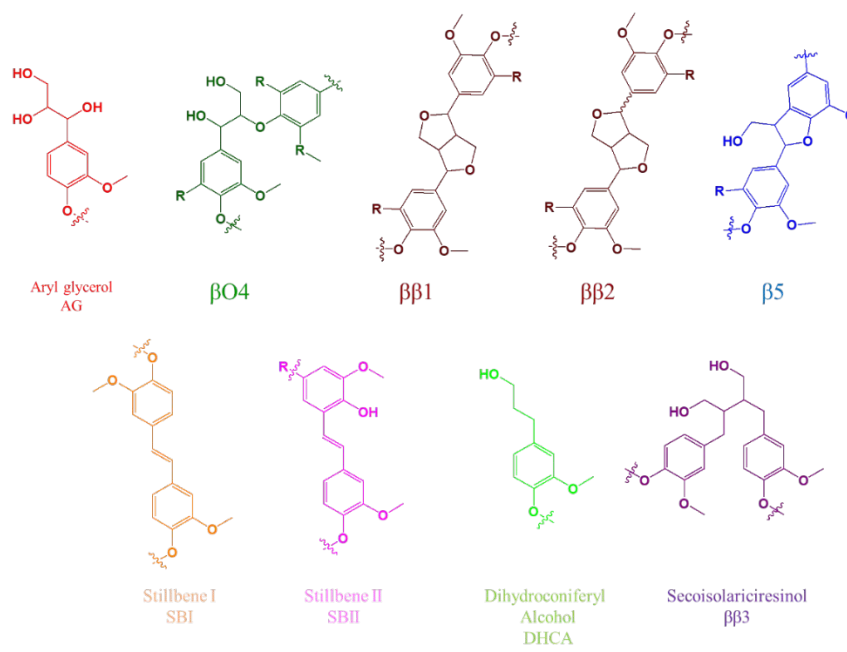

Figure S5: Inter-unit linkages observed in the fractions.

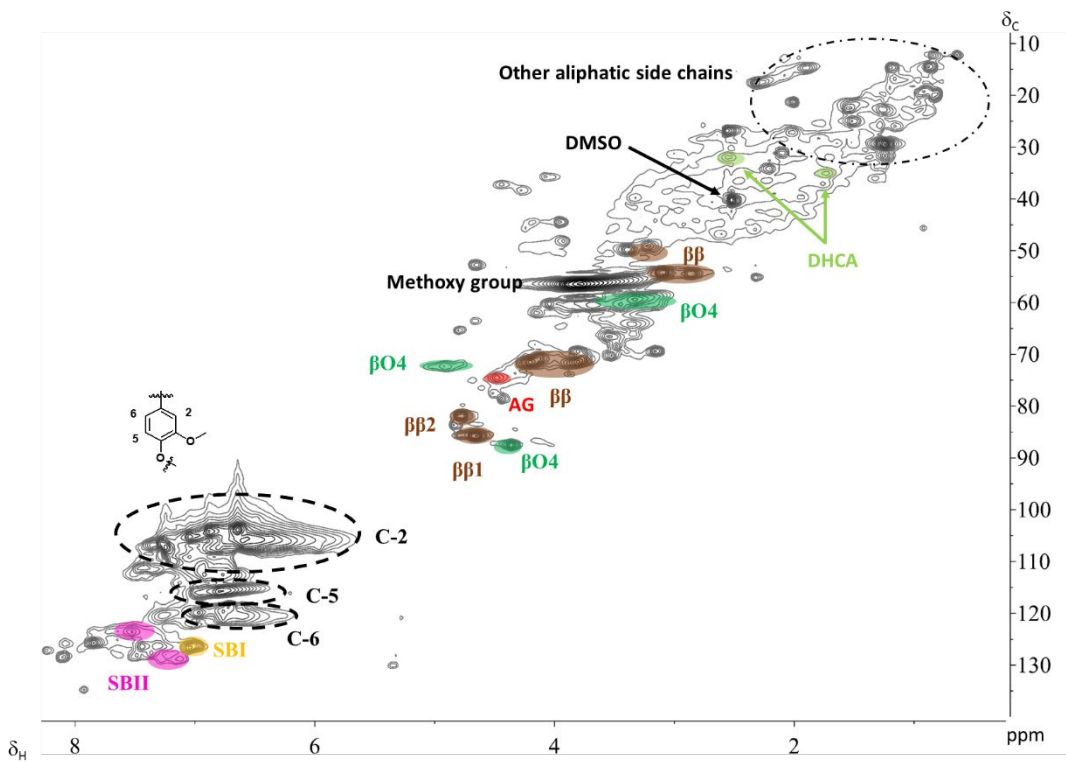

Figure S6: HSQC analysis of the eucalyptus EtOAc fraction (EF<sub>1</sub>).

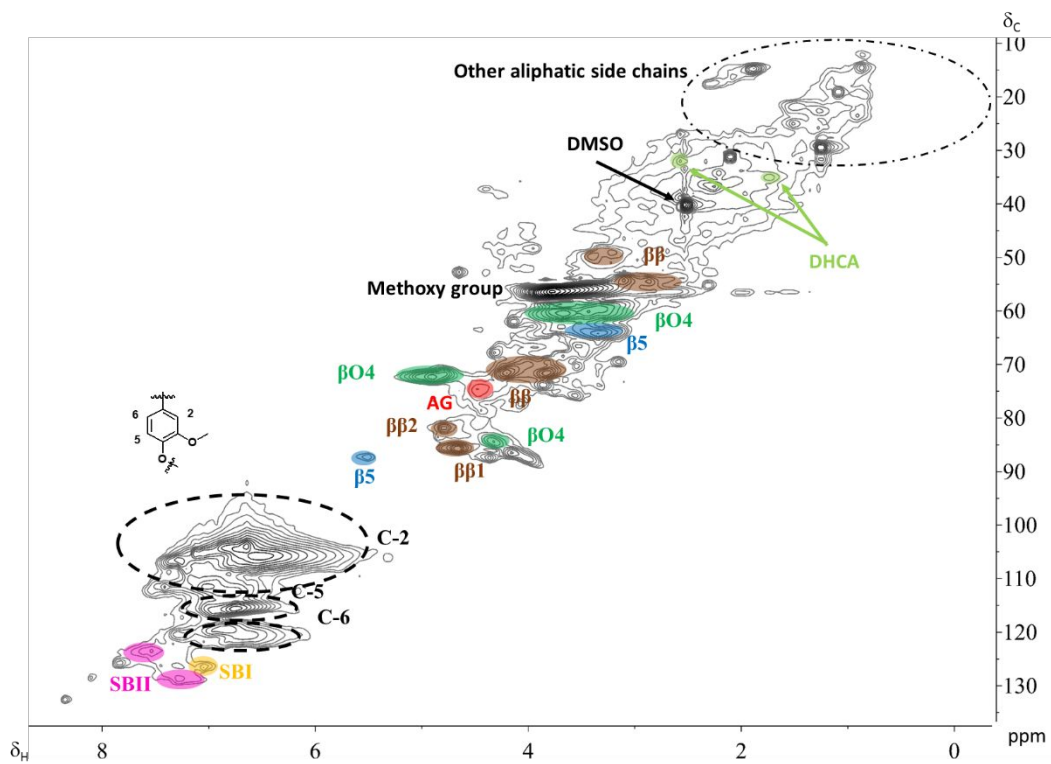

Figure S7: HSQC analysis of the eucalyptus EtOH fraction (EF<sub>2</sub>).

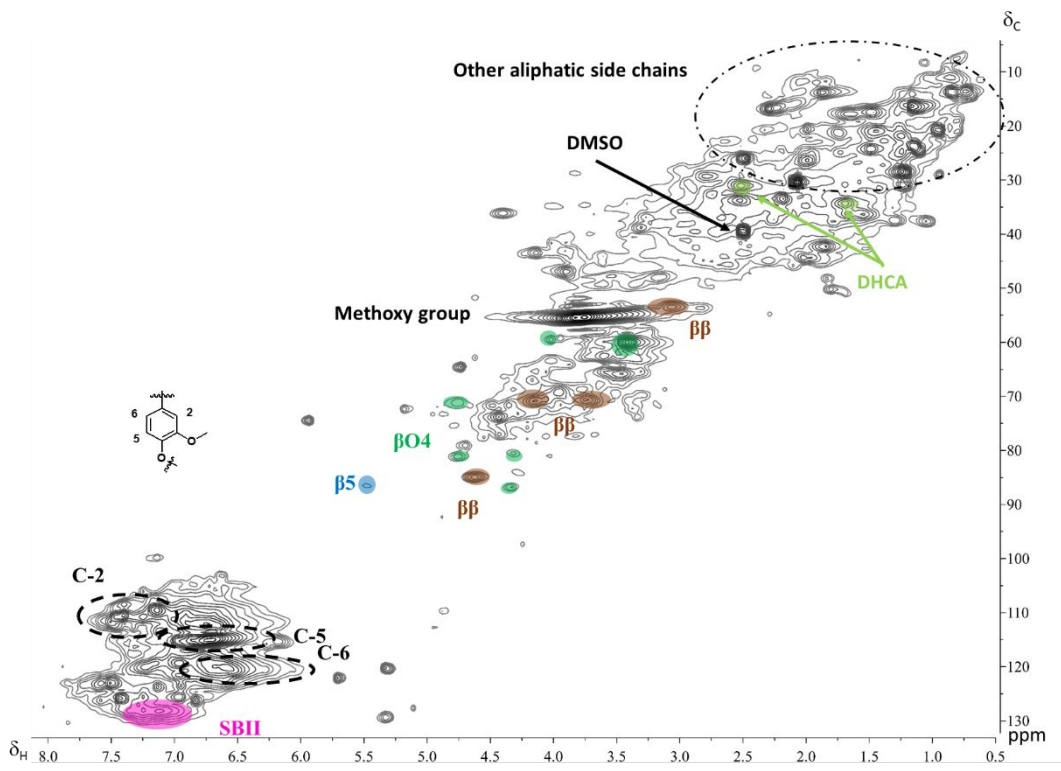

Figure S8: HSQC analysis of the spruce EtOAc fraction (SF).

<sup>13</sup>C-APT NMR

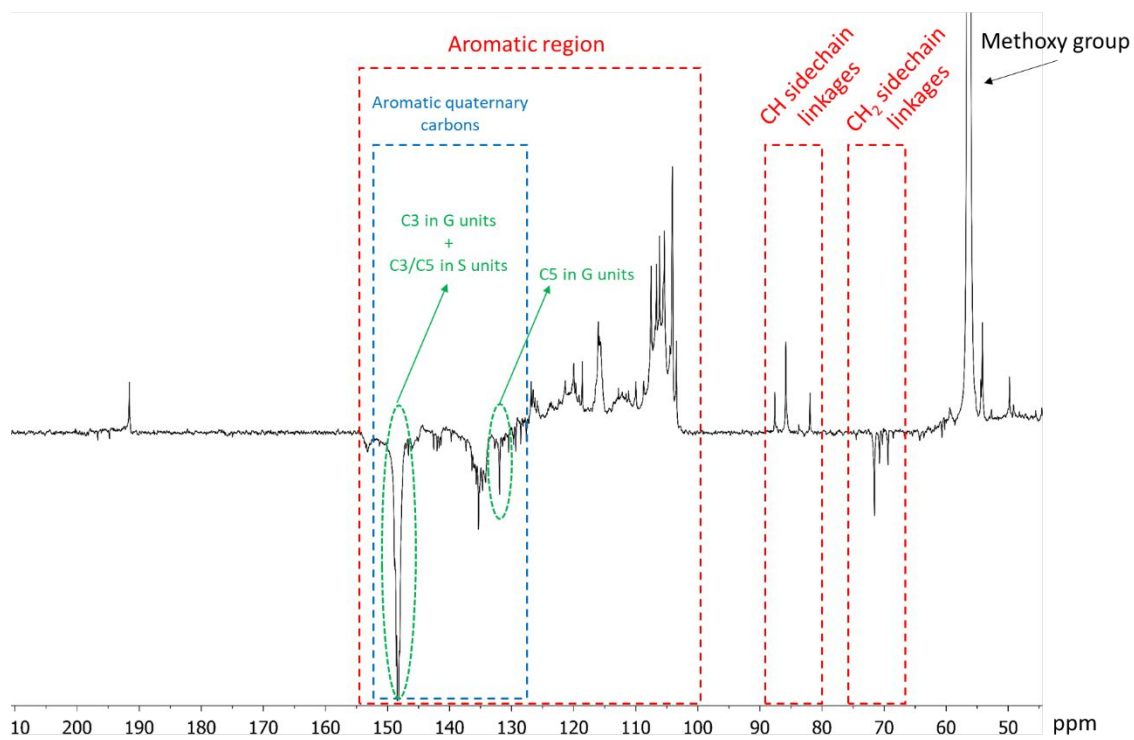

Figure S9: <sup>13</sup>C-APT spectrum of the eucalyptus EtOAc fraction (SE<sub>1</sub>).

## DSC Analysis

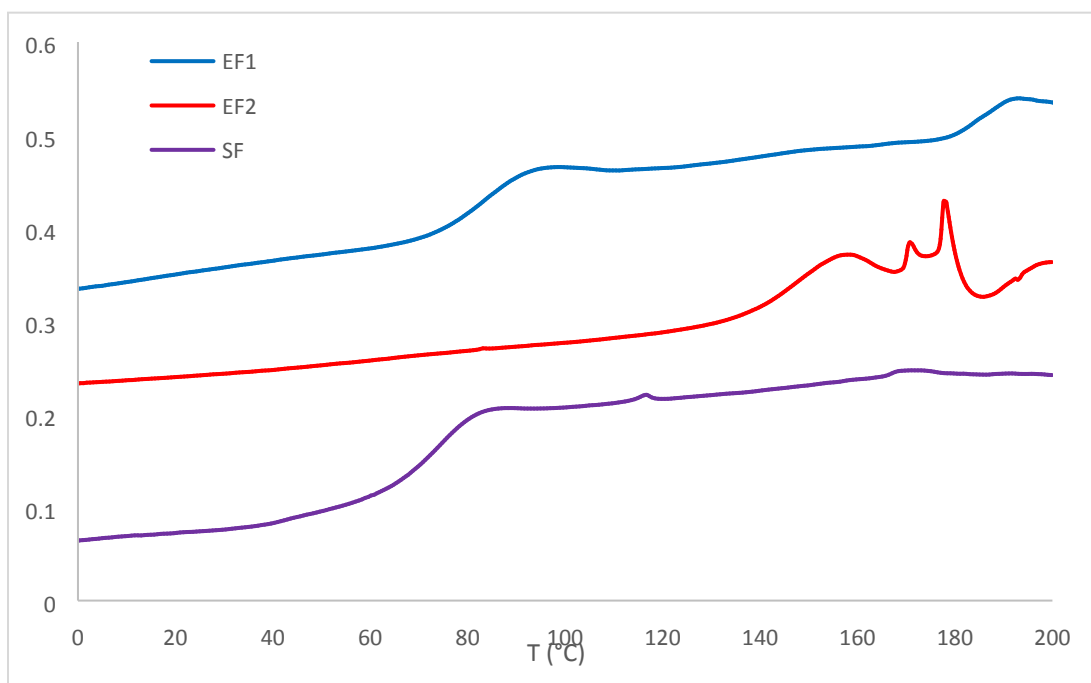

Figure S10: DSC analysis of the different lignin fractions

## Lignin modification.

HSQC of the epoxidated fractions (DMSO- $d_6$ )

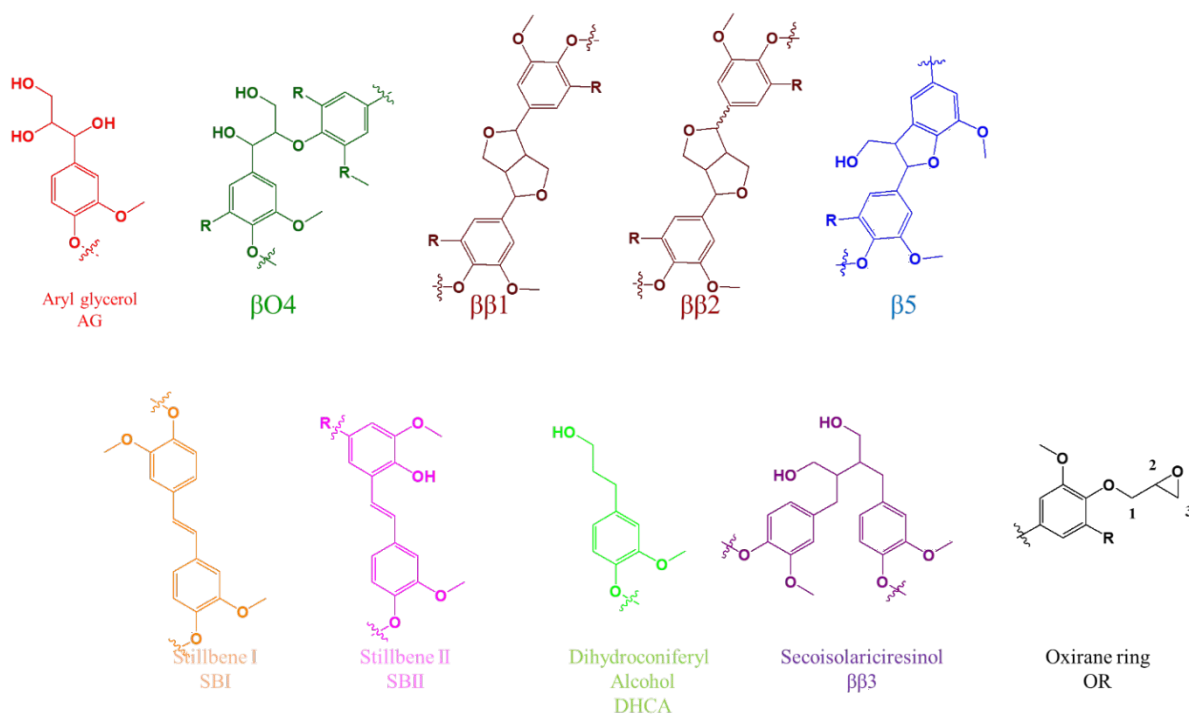

Figure S11: Structures observed in the epoxidated fractions.

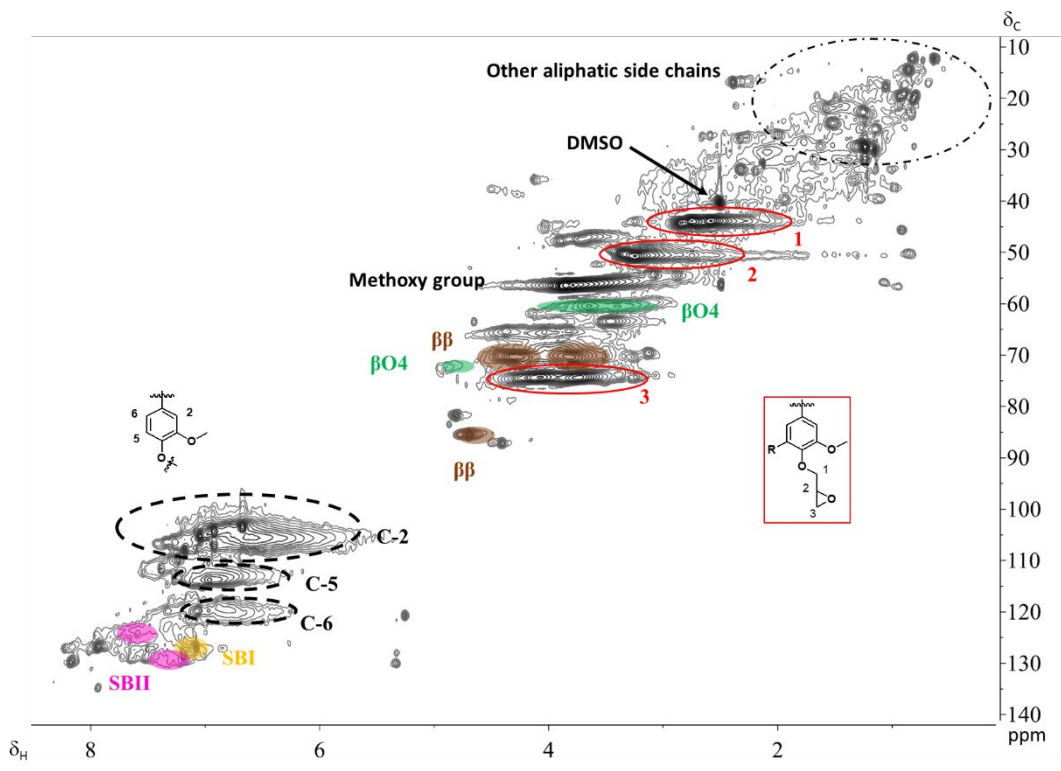

Figure S12: HSQC analysis of the epoxidated eucalyptus EtOAc fraction (EE<sub>1</sub>).

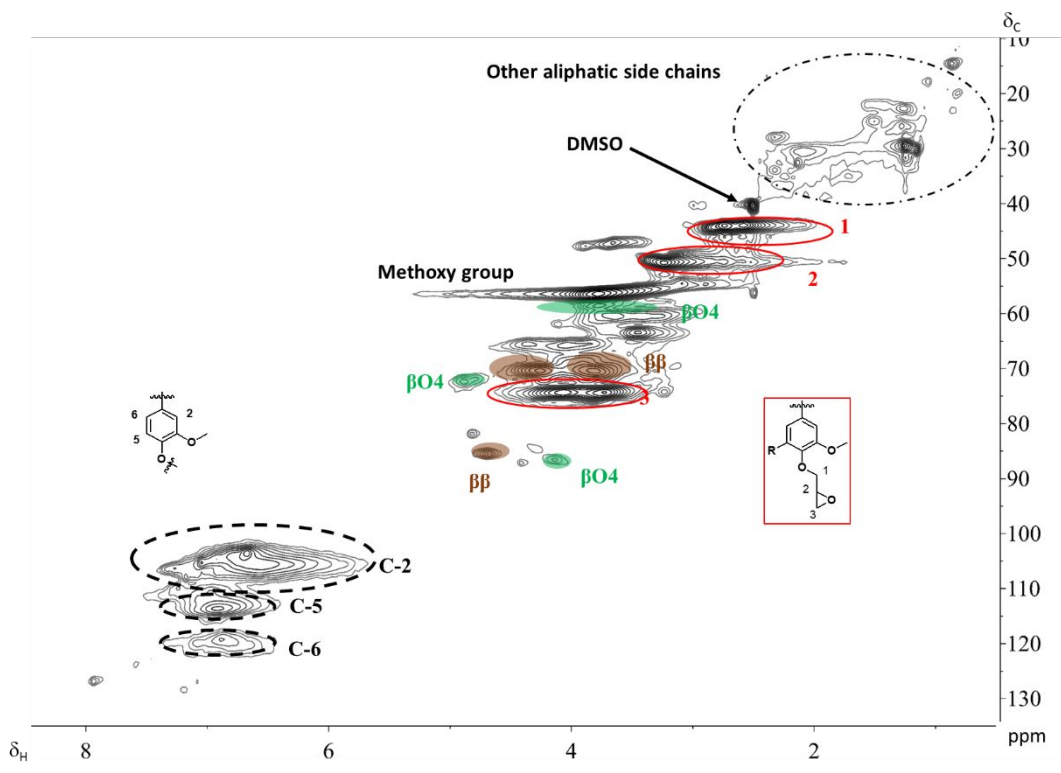

Figure S13: HSQC analysis of the epoxidated eucalyptus EtOH fraction (EE<sub>2</sub>).

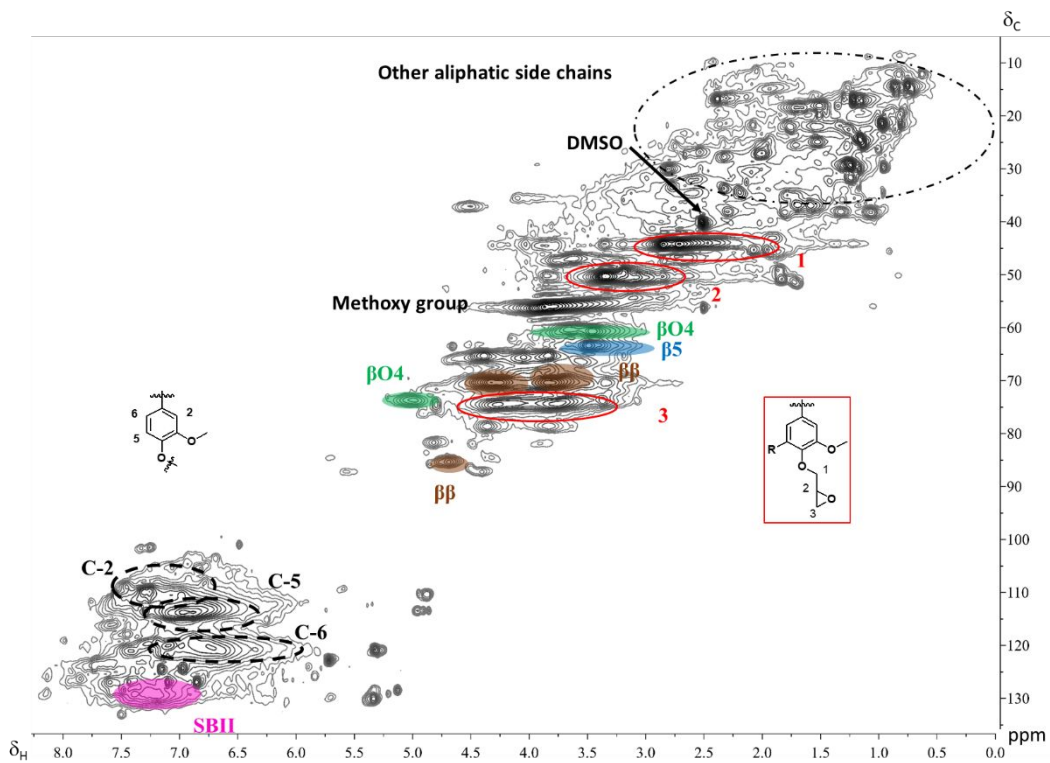

Figure S14: HSQC analysis of the epoxidated spruce EtOAc fraction (SE).

<sup>31</sup>P-NMR (CDCl<sub>3</sub>): Typical example of epoxidated lignin fraction

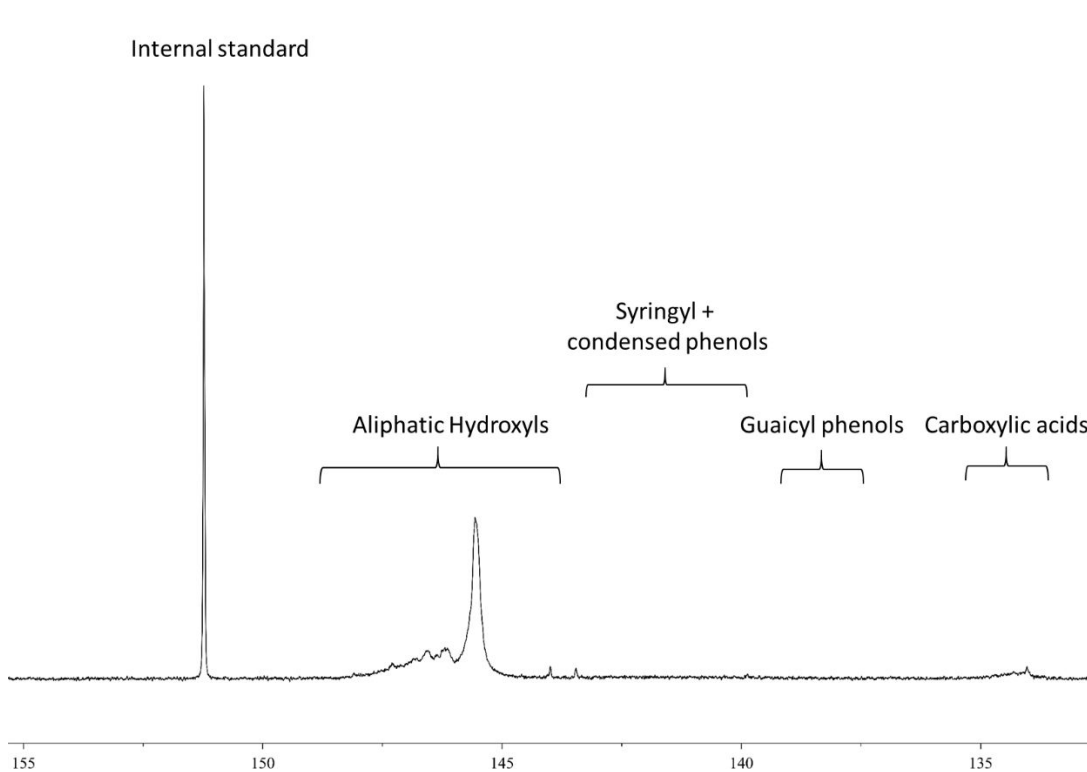

Figure S15: <sup>31</sup>P-NMR of the epoxidated eucalyptus EtOAc fraction (EE<sub>1</sub>).



*<sup>1</sup>H-NMR quantification of the oxirane rings*

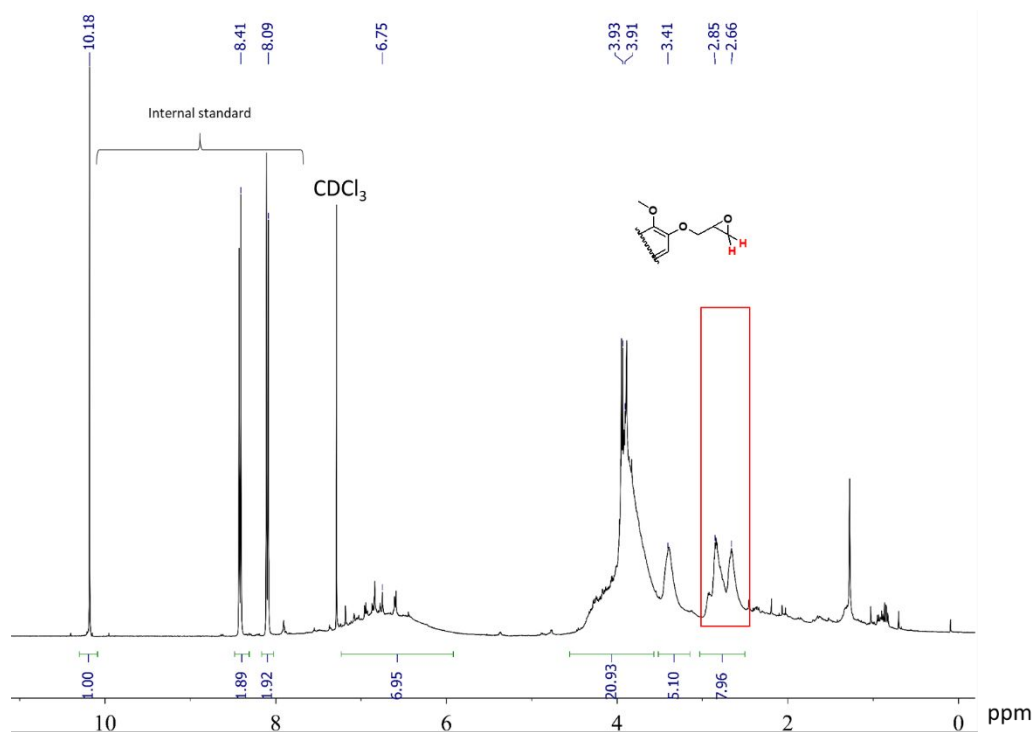

Figure S16: <sup>1</sup>H-NMR quantification of epoxy-groups of EE<sub>1</sub> with 4-nitrobenzaldehyde as internal standard.

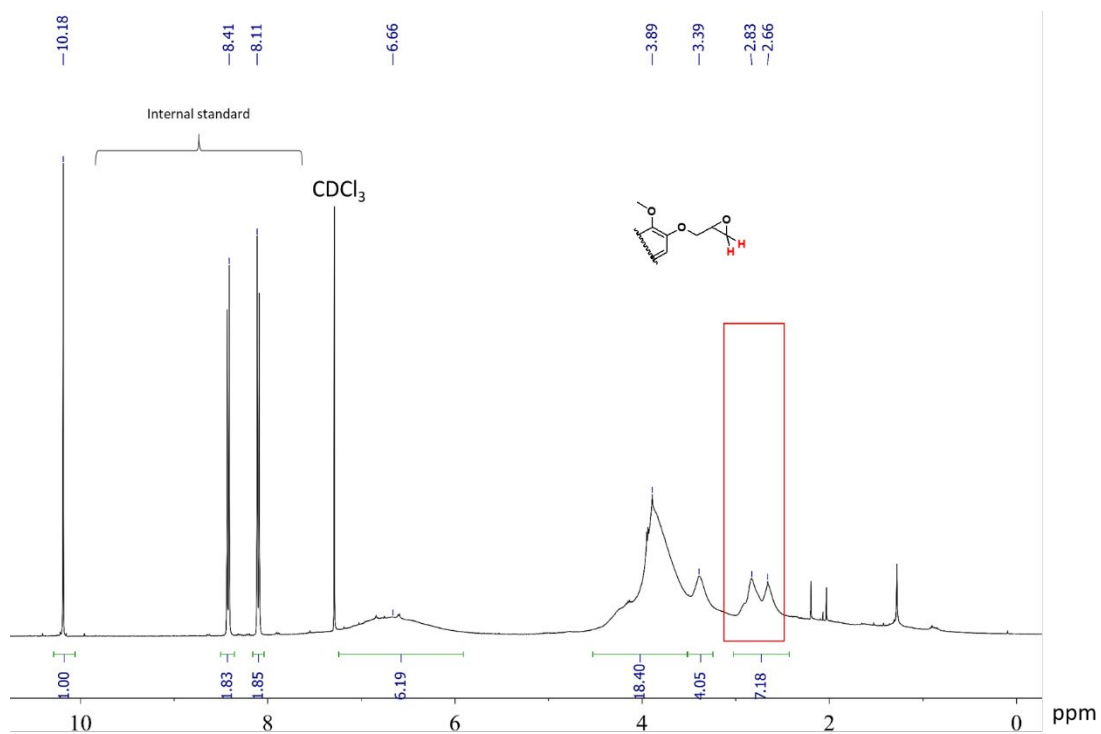

Figure S17: <sup>1</sup>H-NMR quantification of epoxy-groups of EE<sub>2</sub> with 4-nitrobenzaldehyde as internal standard.

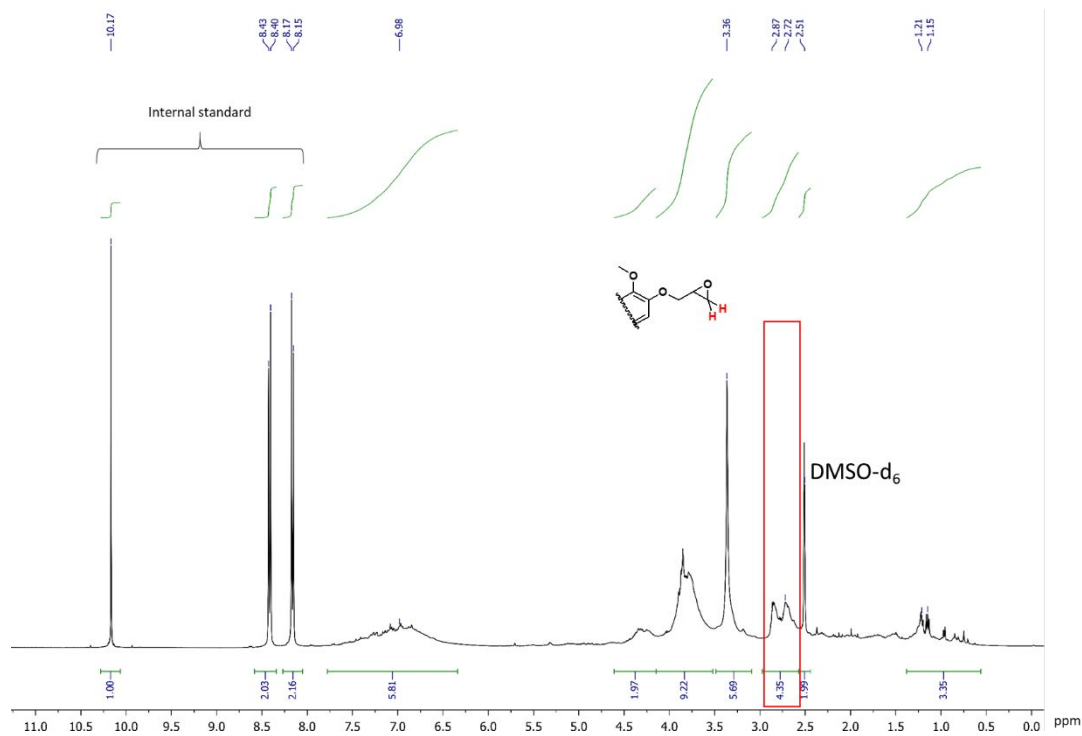

Figure S18: <sup>1</sup>H-NMR quantification of epoxy-groups of SE with 4-nitrobenzaldehyde as internal standard.

### Characterization of the thermosetting resins.

#### FTIR Analysis

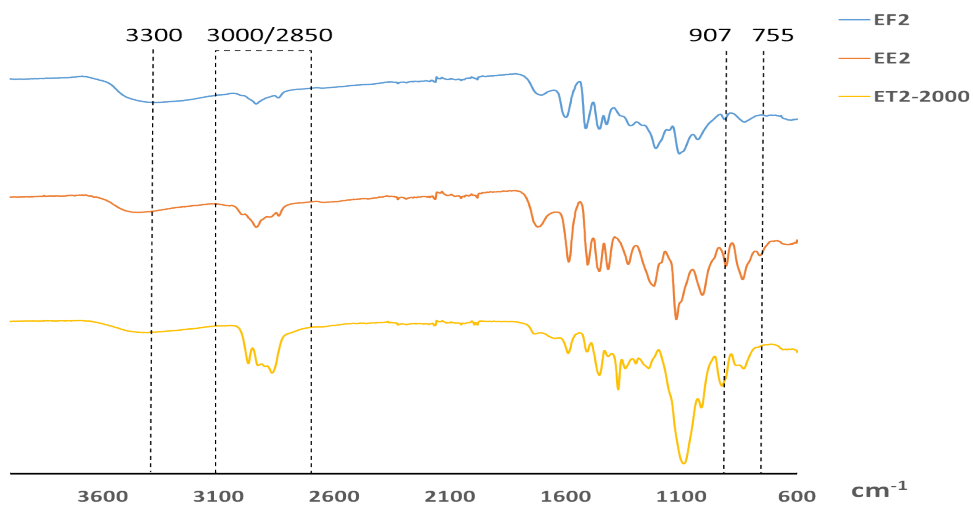

Figure S19: FT-IR analysis comparing the spectra of EF<sub>2</sub>, EE<sub>2</sub> and ET<sub>2-2000</sub>

DSC Analysis

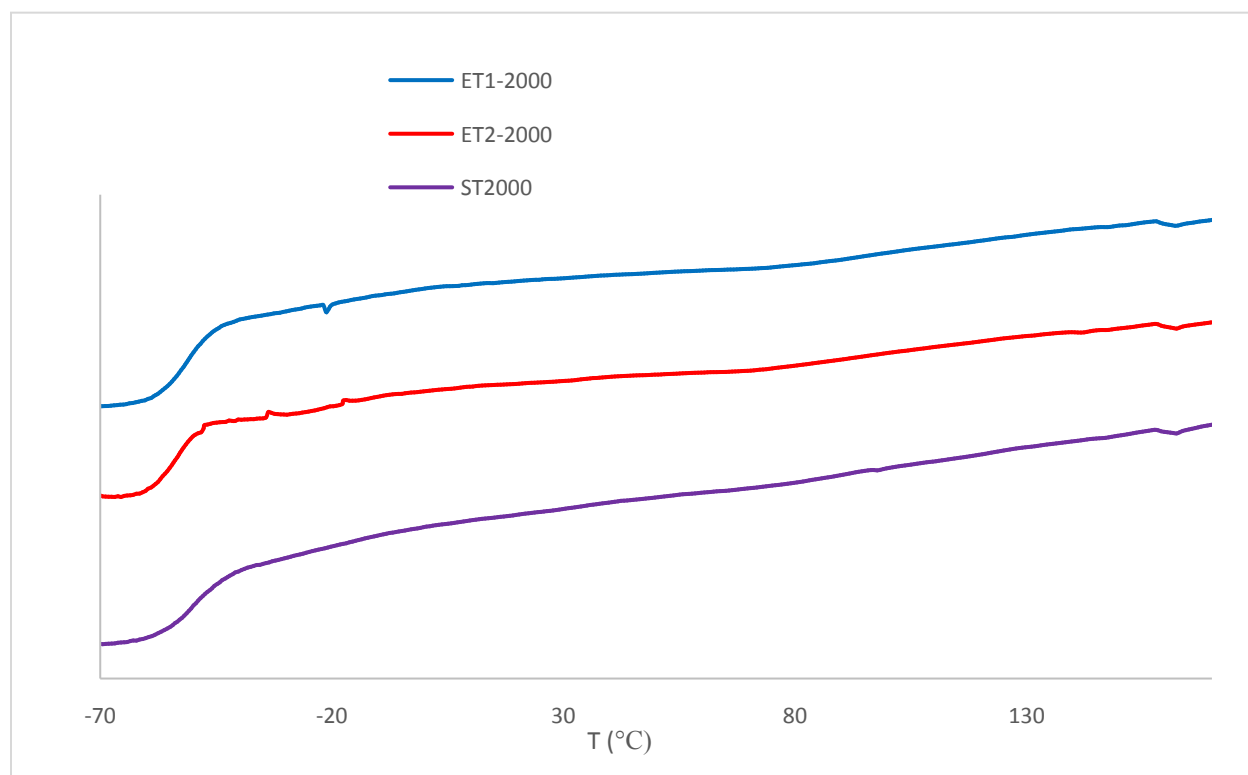

Figure S20: DSC analysis of the resins based on JD 2000.

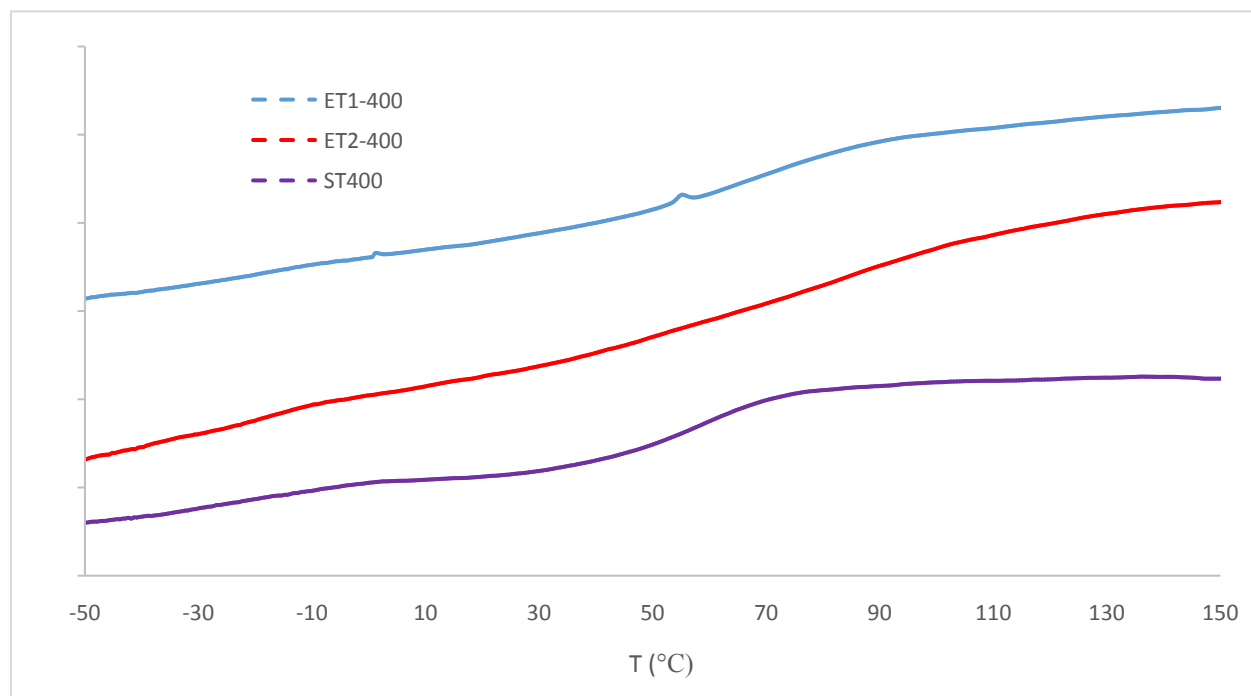

Figure S21: DSC analysis of the resins based on JD 400.

### Tensile tests

(The reported curves represent single experiments. The values reported in the manuscript result from the average and standard deviation of multiple tests)

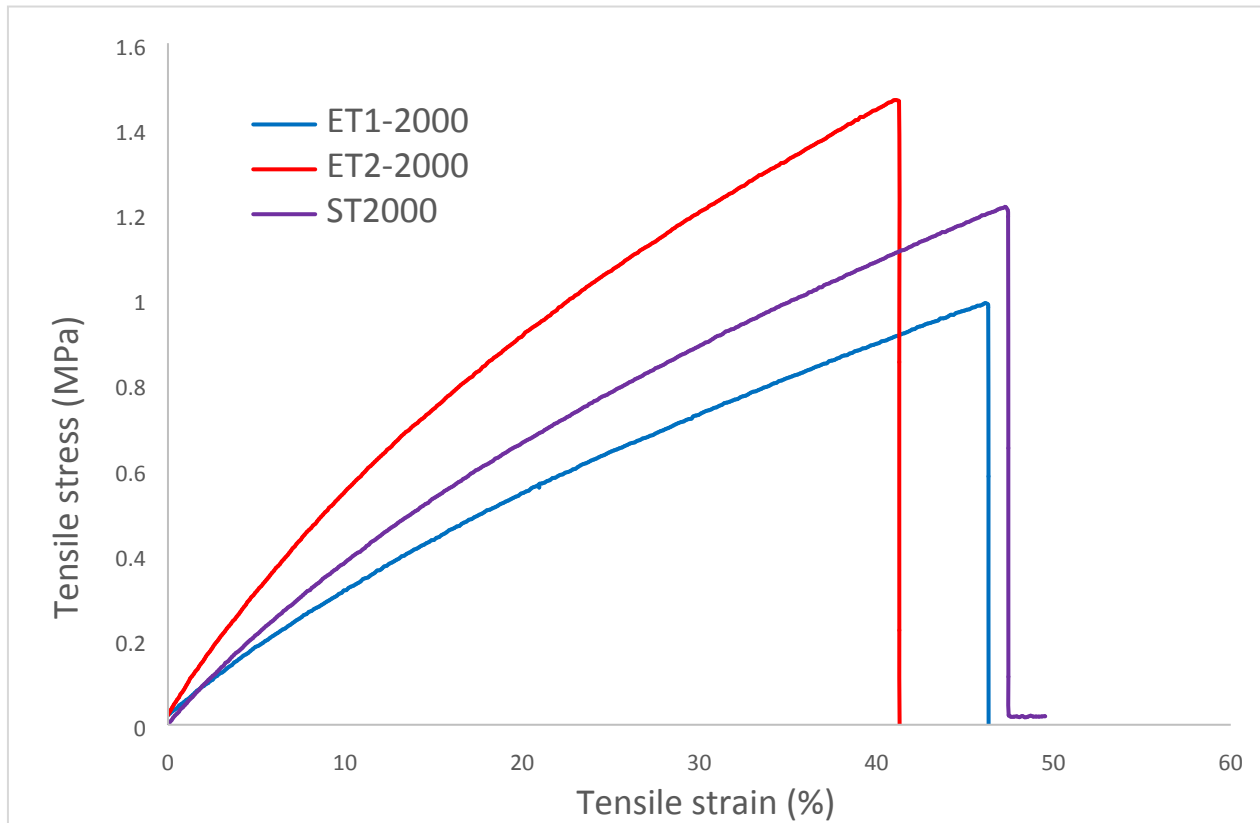

Figure S22: Representative tensile stress-strain curves of the cured resins based on JD 2000

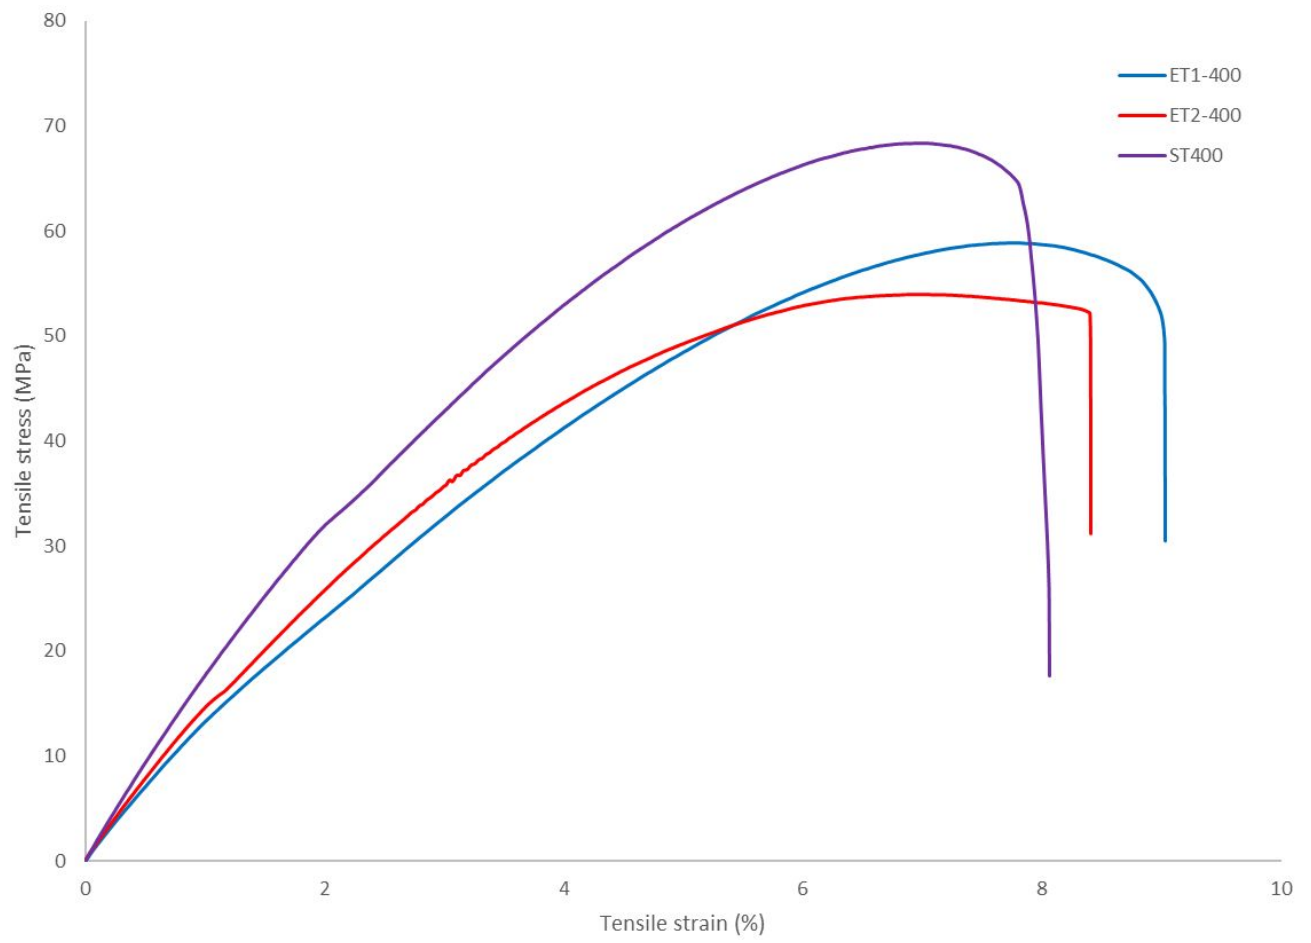

Figure S23: Representative tensile stress-strain curves of the cured resins based on JD 400
